# Supplementary material
Source: publisher site journal article supplement (https://www.dovepress.com/article/585933)
Supplement: Supplementary file 1 [file 585933%20Supplementary%20Material.docx]

**SUPPLEMENTAL MATERIAL**

**Supplementary Table 1.** ATC codes of asthma ICS drugs and definition of low to medium and high dose of ICS

|  | | | |
| --- | --- | --- | --- |
| **ATC-code and active substance** | **Low or medium dose** | **High dose** |
| **ICS** |  |  |
| R03BA01. Beclomethasone | 50µg. 100µg | 200µg |
| R03BA02. Budesonide | 100µg. 200µg | 400µg |
| R03BA05. Fluticasone | 50µg. 125µG 100µg | 250µg |
| R03BA07. Mometasone | 200µg | 400µg |
| R03BA08. Ciclesonide | 80µg | 160µg |
| **ICS/LABA** |  |  |
| R03AK06. Salmeterol and Fluticasone | 50µg/25µg. 100µg/50µg. 125µg/5µg | 250µg/25µg. 500µg/50µg |
| R03AK07. Formoterol and Budesonide | 80µg/4.5µg. 160µg/4.5µg | 320µg/9µg |
| R03AK08. Formoterol and Beclomethasone | 100µg/6µg | 200µg/6µg |
| R03AK10. Vilanterol and Fluticasone furoate | 92µg/22µg | 184µg/22µg |
| R03AK11. Formoterol and Fluticasone | 50µg/5µg. 125µg/5µg | 250µg/10µg |
| R03AK14. Indacaterol and Mometasone | 125µg/127.5µg. 125µg/62.5µg | 125µg/260µg |
| **ICS/LAMA/LABA** |  |  |
| R03AL08. Vilanterol. umeclidinium bromide and fluticasone furoate | 92µg/55µg/22µg |  |
| R03AL09. Formoterol. Glycopyrronium bromide and Beclomethasone | 87µg/5µg/9µG 88µG/5µG/9µG | 172µg/5µg/9µG |
| R03AL11. Formoterol. Glycopyrronium bromide. Budesonide | 160µg/7.2µG/5µG |  |
| R03AL12. Indacaterol. Glukopyrronium. Mometasone | 136µG/46µG/114µG |  |

**Supplementary Table 2.**

|  | **Same treatment step  (n = 688)** | **Escalated treatment  (n= 66)** | **Stepped down  (n= 507)** | **p-value** |
| --- | --- | --- | --- | --- |
| **BMI, mean (SD)** | 28.8 (5.6) n=637 | 29.8 (5.9) n=65 | 28.9 (6.0) n=480 | 0.436 |
| **Smoking history** |  |  |  |  |
| Never smoker, *n* (%) | 385 (59.0) | 31 (50.0) | 291 (59.9) | 0.668 |
| Current smoker, *n* (%) | 88 (13.5) | 10 (16.1) | 61 (12.6) |
| Ex-smoker, *n* (%) | 179 (27.5) | 21 (33.9) | 134 (27.6) |
| **Comorbidities, *n* (%)** |  |  |  |  |
| Allergy, n (%) | 291 (42.3) | 33 (50.0) | 216 (42.6) | 0.478 |
| Cardiovascular, *n* (%) | 303 (44.0) | 35 (53.0) | 215 (42.4) | 0.259 |
| Depression, *n* (%) | 180 (26.2) | 20 (30.3) | 138 (27.2) | 0.741 |
| Diabetes, *n* (%) | 80 (11.6) | 4 (6.1) | 46 (9.1) | 0.181 |
| Rhinitis, *n* (%) | 292 (42.4) | 35 (53.0) | 195 (38.5) | 0.055 |
| **Asthma management education, *n* (%)** | 365 (53.1) | 35 (53.0) | 267 (52.7) | 0.991 |
| **Level of education *(n = 2763)*** |  |  |  |  |
| Primary | 131 (19.3) | 9 (13.6) | 90 (17.9) | 0.628 |
| Secondary | 311 (45.8) | 33 (50.0) | 221 (43.9) |
| Tertiary | 237 (34.9) | 24 (36.4) | 192 (38.2) |

*BMI*, Body mass index

**
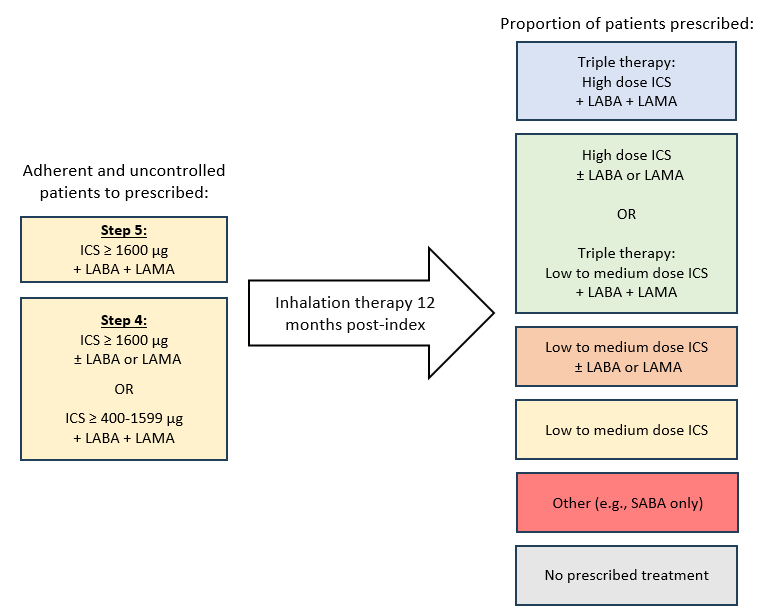
Supplementary Figure 1.** Modifications of prescribed inhalation treatments during post-index.

*ICS*, inhaled corticosteroid; *LABA*, long-acting beta agonist; *LAMA*, long-acting muscarinic antagonist; *SABA*, short-acting beta agonist
